# Supplementary material for: Therapeutic Drug Monitoring as a Tool for the Clinical Outcome Prediction in Vedolizumab-Treated Patients: An Italian Pilot Study
Source: MDPI journal article supplement (doi:10.3390/biomedicines12040824), 2024-04-09
Supplement: s1 [file s1]

**Table S1.** Regression analysis of factors predicting clinical remission at T 12.

|                                | Univariate Analysis |                 |            | Multivariate Analysis |                 |           |
|--------------------------------|---------------------|-----------------|------------|-----------------------|-----------------|-----------|
|                                | Odds Ratio          | <i>p</i> -Value | 95% IC     | Odds Ratio            | <i>p</i> -Value | 95% IC    |
| Male                           | 1.44                | 0.57            | 0.41–5.07  |                       |                 |           |
| Age                            | 0.99                | 0.48            | 0.95–1.02  |                       |                 |           |
| Body Mass Index                | 1.14                | 0.18            | 0.94–1.38  |                       |                 |           |
| Active smokers                 | 0.50                | 0.48            | 0.07–3.38  |                       |                 |           |
| Crohn's disease                | 1.67                | 0.43            | 0.46–6.06  |                       |                 |           |
| 5-aminosalicylic acid          | 2.14                | 0.24            | 0.59–7.77  |                       |                 |           |
| Topical corticosteroids        | 0.78                | 0.77            | 0.16–3.67  |                       |                 |           |
| Systemic corticosteroids       | 0.76                | 0.67            | 0.22–2.71  |                       |                 |           |
| Immunomodulators               | 0.80                | 0.83            | 0.10–6.32  |                       |                 |           |
| HBI T 0                        | 0.94                | 0.63            | 0.75–1.20  |                       |                 |           |
| HBI T 6                        | 0.65                | 0.07            | 0.40–1.04  |                       |                 |           |
| PMS T 0                        | 0.59                | 0.09            | 0.32–1.09  |                       |                 |           |
| PMS T 6                        | 0.47                | 0.02            | 0.25–0.89  | 0.59                  | 0.11            | 0.31–1.12 |
| C-RP T 0                       | 0.47                | 0.25            | 0.13–1.69  |                       |                 |           |
| C-RP T 6                       | 0.24                | 0.04            | 0.06–0.92  | 0.36                  | 0.43            | 0.03–4.59 |
| Hemoglobin T 0                 | 2.14                | 0.04            | 1.04–4.43  | 1.78                  | 0.50            | 0.33–9.49 |
| Hemoglobin T 6                 | 1.86                | 0.02            | 1.11–3.12  | 1.03                  | 0.95            | 0.45–2.35 |
| Fecal Calprotectin T 0         | 0.99                | 0.25            | 0.99–1.01  |                       |                 |           |
| Fecal Calprotectin T 6         | 0.99                | 0.08            | 0.99–1.00  |                       |                 |           |
| Vedolizumab concentrations T 6 | 1.02                | 0.03            | 1.002–1.03 | 1.01                  | 0.36            | 0.99–1.04 |
| Ulcerative colitis             | 1.01                | 0.80            | 0.99–1.02  |                       |                 |           |
